# Supplementary material
Source: PubMed Central journal article supplement (PMC9035226)

A

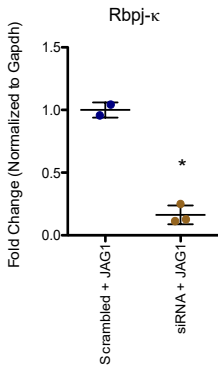

B

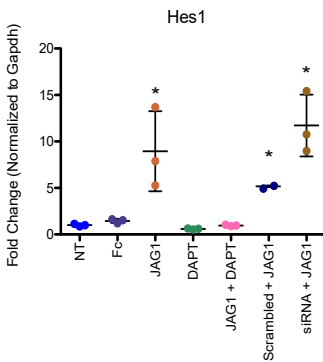

Supplement: NIHMS1788676-supplement-suppl_figure_3.pdf [file NIHMS1788676-supplement-suppl_figure_3.pdf]

## Supplemental Figure 1

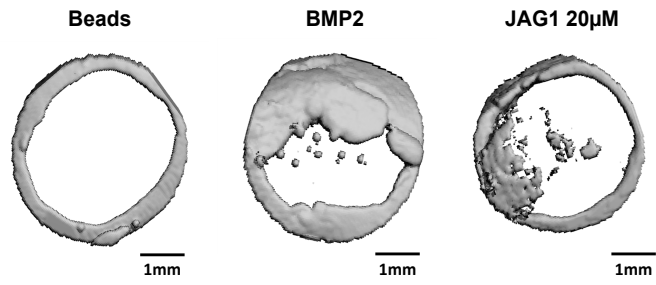

Supplement: NIHMS1788676-supplement-supplemental_figure_1.pdf [file NIHMS1788676-supplement-supplemental_figure_1.pdf]
